# Supplementary material for: Prenatal Bisphenol A Exposure and Child Behavior in an Inner-City Cohort
Source: PubMed Central journal article supplement (PMC3440080; doi:10.1289/ehp.1104492), 2012-04-27
Supplement: ehp.1104492.s001.pdf [file ehp.1104492.s001.pdf]

## Supplemental Material

### Prenatal Bisphenol A Exposure and Child Behavior in an Inner City Cohort

Frederica Perera, Julia Vishnevetsky, Julie B. Herbstman, Antonia M. Calafat, Wei Xiong,  
Virginia Rauh, Shuang Wang

## Table of Contents

|                                                                                                                                                                                              |   |
|----------------------------------------------------------------------------------------------------------------------------------------------------------------------------------------------|---|
| Supplemental Material, Table S1. Comparison between the study sample included and sample missing postnatal BPA concentrations. ....                                                          | 3 |
| Supplemental Material Table S2. Quartile postnatal BPA on CBCL scores adjusting for covariates and quartile prenatal BPA <sup>a,b,c</sup> .....                                              | 4 |
| Supplemental Material, Table S3. Association between quartile prenatal BPA concentrations and CBCL scores, adjusting for covariates and quartile prenatal BPA <sup>a,b,c</sup> .....         | 5 |
| Supplemental Material Table S4. Association between prenatal BPA (high/low) and CBCL scores, adjusting for postnatal BPA and covariates, excluding one male subject <sup>a,b,c,d</sup> ..... | 6 |

Supplemental Material, Table S1. Comparison between the study sample included and sample missing postnatal BPA concentrations.

| Variable                                                     | Subjects in the analysis<br>(N=198) |         | Subjects not included <sup>a</sup><br>(N=86) |         | P-value for testing difference |
|--------------------------------------------------------------|-------------------------------------|---------|----------------------------------------------|---------|--------------------------------|
|                                                              | Mean                                | Std Dev | Mean                                         | Std Dev |                                |
| Prenatal BPA urinary concentration (µg/L)                    | 1.96 <sup>b</sup>                   | 3.12    | 2.14 <sup>b</sup>                            | 6.40    | 0.163                          |
| Prenatal mono-n-butyl phthalate urinary concentration (µg/L) | 63.42                               | 97.34   | 60.23                                        | 76.59   | 0.767                          |
| Age at assessment (month)                                    | 38.27                               | 5.24    | 38.62                                        | 6.02    | 0.623                          |
| % smoking at home                                            | 33.84%                              |         | 24.42%                                       |         | 0.115                          |
| % female                                                     | 56.06%                              |         | 48.84%                                       |         | 0.262                          |
| % <sub>≥</sub> high school education                         | 58.59%                              |         | 62.79%                                       |         | 0.507                          |
| % African American                                           | 36.87%                              |         | 32.56%                                       |         | 0.486                          |
| Gestational age (weeks)                                      |                                     |         |                                              | 1.36    | 0.004                          |
| Maternal TONI score                                          | 19.83                               | 8.94    | 19.17                                        | 8.22    | 0.562                          |
| Home environment                                             | 39.69                               | 6.34    | 39.78                                        | 5.72    | 0.913                          |
| Maternal demoralization score                                | 1.09                                | 0.63    | 1.12                                         | 0.62    | 0.667                          |

<sup>a</sup>Subjects with CBCL scores, prenatal BPA measurements and all other covariates except postnatal BPA

<sup>b</sup>The means of prenatal BPA are geometric means.

Supplemental Material Table S2. Quartile postnatal BPA on CBCL scores adjusting for covariates and quartile prenatal BPA<sup>a,b,c</sup>

|                      | All children<br>(N = 198) |         | Boys<br>(N = 87)     |         | Girls<br>(N = 111)   |         | Interaction<br>(N=198) |
|----------------------|---------------------------|---------|----------------------|---------|----------------------|---------|------------------------|
| CBCL outcome         | Estimate<br>(95% CI)      | p-value | Estimate<br>(95% CI) | p-value | Estimate<br>(95% CI) | p-value | p-value                |
| Emotionally Reactive | 0.76<br>(0.59, 0.97)      | 0.029   | 0.94<br>(0.63, 1.4)  | 0.764   | 0.74<br>(0.53, 1.03) | 0.078   | 0.474                  |
| Anxious/Depressed    | 1.08<br>(0.9, 1.3)        | 0.403   | 1.23<br>(0.92, 1.67) | 0.162   | 1.14<br>(0.9, 1.46)  | 0.274   | 0.715                  |
| Somatic Complaints   | 1.01<br>(0.81, 1.26)      | 0.913   | 0.92<br>(0.64, 1.34) | 0.679   | 1.12<br>(0.84, 1.49) | 0.445   | 0.379                  |
| Withdrawn            | 0.99<br>(0.79, 1.26)      | 0.956   | 1.01<br>(0.68, 1.49) | 0.958   | 1.08<br>(0.79, 1.48) | 0.615   | 0.651                  |
| Sleep problems       | 1.08<br>(0.9, 1.31)       | 0.428   | 0.93<br>(0.66, 1.3)  | 0.661   | 1.22<br>(0.95, 1.55) | 0.113   | 0.200                  |
| Attention Problems   | 0.88<br>(0.72, 1.08)      | 0.216   | 0.98<br>(0.71, 1.34) | 0.891   | 0.85<br>(0.64, 1.13) | 0.271   | 0.766                  |
| Aggressive Behavior  | 0.93<br>(0.84, 1.04)      | 0.201   | 1.03<br>(0.87, 1.22) | 0.748   | 0.91<br>(0.79, 1.05) | 0.207   | 0.803                  |

  

|                        | All children<br>(N = 198) |         | Boys<br>(N = 87)      |         | Girls<br>(N = 111)     |         | Interaction<br>(N=198) |
|------------------------|---------------------------|---------|-----------------------|---------|------------------------|---------|------------------------|
| CBCL outcome           | Estimate<br>(95% CI)      | p-value | Estimate<br>(95% CI)  | p-value | Estimate<br>(95% CI)   | p-value | p-value                |
| Internalizing Problems | -0.20<br>(-2.25, 1.86)    | 0.851   | 0.37<br>(-2.90, 3.64) | 0.823   | 0.27<br>(-2.22, 2.76)  | 0.830   | 0.821                  |
| Externalizing Problems | -1.02<br>(-3.57, 1.54)    | 0.435   | 0.16<br>(-3.34, 3.67) | 0.928   | -1.39<br>(-4.92, 2.14) | 0.439   | 0.889                  |

<sup>a</sup> Pre- and postnatal BPA urinary concentrations were SG-adjusted and dichotomized as Q4 vs. Q1-Q3 based on logarithm transformed SG adjusted values

<sup>b</sup> Adjusted for postnatal BPA measurements, prenatal mono-n-butyl phthalate concentration, age at assessment, smoking at home, child sex, maternal education ( $\geq$ high school or not), ethnicity (African American or not), gestational age, HOME inventory, TONI score, and maternal demoralization during pregnancy.

<sup>c</sup> The seven Syndromes scales were fitted using Poisson log-linear models. For interpretability we report the exponentiated beta in the Estimate column. The two Composite scales were fitted in linear models. Therefore, in that Estimate column, the values are the original betas. In addition, the estimates for the Syndrome scores indicate multiplicative difference between high and low exposure, whereas the estimate for composite scores indicates the average difference in scores for high versus low exposure on an absolute scale

Supplemental Material, Table S3. Association between quartile prenatal BPA concentrations and CBCL scores, adjusting for covariates and quartile prenatal BPA <sup>a, b, c</sup>

| CBCL outcome         | All children (N = 198) |         | Boys (N = 87)     |         | Girls (N = 111)   |         | Interaction (N=198) |
|----------------------|------------------------|---------|-------------------|---------|-------------------|---------|---------------------|
|                      | Estimate (95% CI)      | p-value | Estimate (95% CI) | p-value | Estimate (95% CI) | p-value | p-value             |
| Emotionally Reactive | 1.01 (0.78, 1.29)      | 0.959   | 1.62 (1.14, 2.32) | 0.008   | 0.71 (0.50, 1.02) | 0.064   | 0.001               |
| Anxious/Depressed    | 0.96 (0.79, 1.17)      | 0.691   | 1.22 (0.90, 1.66) | 0.195   | 0.77 (0.58, 1.01) | 0.060   | 0.102               |
| Somatic Complaints   | 0.94 (0.74, 1.19)      | 0.579   | 1.16 (0.82, 1.64) | 0.401   | 0.79 (0.57, 1.11) | 0.171   | 0.128               |
| Withdrawn            | 1.02 (0.80, 1.31)      | 0.864   | 1.42 (0.97, 2.07) | 0.072   | 0.80 (0.57, 1.13) | 0.199   | 0.069               |
| Sleep problems       | 1.09 (0.89, 1.34)      | 0.395   | 1.38 (1.00, 1.90) | 0.051   | 0.95 (0.73, 1.25) | 0.719   | 0.089               |
| Attention Problems   | 0.97 (0.78, 1.20)      | 0.744   | 1.24 (0.90, 1.70) | 0.191   | 0.78 (0.58, 1.06) | 0.110   | 0.115               |
| Aggressive Behavior  | 0.98 (0.88, 1.10)      | 0.732   | 1.29 (1.09, 1.53) | 0.003   | 0.81 (0.69, 0.95) | 0.008   | 0.001               |

  

| CBCL outcome           | All children (N = 198) |         | Boys (N = 87)      |         | Girls (N = 111)     |         | Interaction (N=198) |
|------------------------|------------------------|---------|--------------------|---------|---------------------|---------|---------------------|
|                        | Estimate (95% CI)      | p-value | Estimate (95% CI)  | p-value | Estimate (95% CI)   | p-value | p-value             |
| Internalizing Problems | -0.09 (-2.32, 2.14)    | 0.937   | 3.28 (-0.42, 6.98) | 0.082   | -2.33 (-4.97, 0.31) | 0.084   | 0.035               |
| Externalizing Problems | -0.29 (-3.07, 2.49)    | 0.837   | 3.52 (-0.45, 7.49) | 0.082   | -2.73 (-6.50, 1.05) | 0.157   | 0.069               |

<sup>a</sup> Pre- and postnatal BPA urinary concentrations were SG-adjusted and dichotomized as Q4 vs. Q1-Q3 based on logarithm transformed SG adjusted values

<sup>b</sup> Adjusted for postnatal BPA measurements, prenatal mono-n-butyl phthalate concentration, age at assessment, smoking at home, child sex, maternal education ( $\geq$ high school or not), ethnicity (African American or not), gestational age, HOME inventory, TONI score, and maternal demoralization during pregnancy.

<sup>c</sup> The seven Syndromes scales were fitted using Poisson log-linear models. For interpretability we report the exponentiated beta in the Estimate column. The two Composite scales were fitted in linear models. Therefore, in that Estimate column, the values are the original betas. In addition, the estimates for the Syndrome scores indicate multiplicative difference between high and low exposure, whereas the estimate for composite scores indicates the average difference in scores for high versus low exposure on an absolute scale

Supplemental Material Table S4. Association between prenatal BPA (high/low) and CBCL scores, adjusting for postnatal BPA and covariates, excluding one male subject<sup>a, b, c, d</sup>

|                        | All children<br>(N = 197) |         | Boys<br>(N = 86)      |         | Girls<br>(N = 111)     |         | Interaction<br>(N = 197) |
|------------------------|---------------------------|---------|-----------------------|---------|------------------------|---------|--------------------------|
| Syndrome Scores        | Estimate<br>(95% CI)      | p-value | Estimate<br>(95% CI)  | p-value | Estimate<br>(95% CI)   | p-value | p-value                  |
| Emotionally Reactive   | 1.27<br>(0.87, 1.87)      | 0.220   | 1.37<br>(0.92, 2.03)  | 0.118   | 0.74<br>(0.51, 1.07)   | 0.112   | 0.037                    |
| Anxious/Depressed      | 1.00<br>(0.73, 1.39)      | 0.977   | 1.07<br>(0.77, 1.50)  | 0.684   | 0.75<br>(0.57, 0.99)   | 0.040   | 0.371                    |
| Somatic Complaints     | 1.13<br>(0.79, 1.62)      | 0.493   | 1.14<br>(0.79, 1.64)  | 0.494   | 0.77<br>(0.55, 1.09)   | 0.139   | 0.145                    |
| Withdrawn              | 1.17<br>(0.79, 1.75)      | 0.437   | 1.24<br>(0.83, 1.87)  | 0.295   | 0.79<br>(0.56, 1.11)   | 0.177   | 0.231                    |
| Sleep problems         | 1.35<br>(0.97, 1.87)      | 0.071   | 1.36<br>(0.98, 1.90)  | 0.068   | 0.92<br>(0.7, 1.21)    | 0.562   | 0.090                    |
| Attention Problems     | 1.10<br>(0.80, 1.53)      | 0.549   | 1.18<br>(0.84, 1.64)  | 0.337   | 0.80<br>(0.59, 1.08)   | 0.149   | 0.236                    |
| Aggressive Behavior    | 1.14<br>(0.96, 1.36)      | 0.145   | 1.19<br>(1.00, 1.43)  | 0.052   | 0.82<br>(0.70, 0.97)   | 0.017   | 0.010                    |
|                        | All children<br>(N = 197) |         | Boys<br>(N = 86)      |         | Girls<br>(N = 111)     |         | Interaction<br>(N = 197) |
| Composite Scores       | Estimate<br>(95% CI)      | p-value | Estimate<br>(95% CI)  | p-value | Estimate<br>(95% CI)   | p-value | p-value                  |
| Internalizing Problems | 1.32<br>(-2.16, 4.80)     | 0.457   | 1.88<br>(-1.65, 5.41) | 0.296   | -2.35<br>(-5.02, 0.31) | 0.084   | 0.160                    |
| Externalizing Problems | 1.81<br>(-2.65, 6.26)     | 0.427   | 2.42<br>(-1.50, 6.35) | 0.226   | -2.51<br>(-6.31, 1.29) | 0.195   | 0.174                    |

<sup>a</sup> Pre- and postnatal BPA concentrations were dichotomized as upper quartile based on logarithm transformed SG-adjusted values

<sup>b</sup> Four types of models were fitted separately to assess the main effects of prenatal BPA on both boys and girls (column 1), boys only (column 2) and girls only (column 3) and the interaction effects of prenatal BPA on both boys and girls (column 4).

<sup>c</sup> The covariates in each model are the same: postnatal BPA measurements, prenatal mono-n-butyl phthalate concentration, age at assessment (in months), smoking at home (yes or no), child sex, maternal education ( $\geq$ high school or not), ethnicity (African American or not), gestational age (in weeks), HOME inventory score, TONI score, and PERI-D score.

<sup>d</sup> The seven Syndromes scales were fitted using Poisson log-linear models. For interpretability we report the exponentiated beta in the Estimate column. The two Composite scales were fitted in linear models. Therefore, in that Estimate column, the values are the original betas. In addition, the estimates for the Syndrome scores indicate multiplicative difference between high

and low exposure, whereas the estimate for composite scores indicates the average difference in scores for high versus low exposure on an absolute scale
